# Supplementary material for: Quantitative Trait Loci for Morphological Traits and their Association with Functional Genes in Raphanus sativus
Source: Front Plant Sci. 2016 Mar 4;7:255. doi: 10.3389/fpls.2016.00255 (PMC4777717; doi:10.3389/fpls.2016.00255)
Supplement: Supplementary Table 1 — Marker information and chromosome number in B. rapa and homologuous loci in A. thaliana number. [file Table1.XLSX]

## Sheet: Sheet1
Supplement Table 1 Chromosome number in B. rapa and Homologuous loci in A. thaliana number
	Marker name	Raphanus sativus			B.rapa		A.thaliana
Nr		Linkage group	Position		Chromosome		Chromosome	LOCUS	block	E-value
1	cnu_mBRPGM0092	1	0		10		5	AT5G03650.1	R	1e-49
2	ACMP0112	1	2.392		10
3	RSS1786	1	2.943		3		5	AT5G01160.1	R	8e-70
4	RSS3911	1	5.063		10
5	cnu_mBRPGM0347	1	10.123		3		5	AT5G14990.2	R	7e-20
6	cnu_mBRPGM1596	1	11.942		10		5	AT5G14910.1	R	7e-44
7	cnu_mBRPGM0179	1	13.748		10		5	AT5G12980.1	R	7e-16
8	cnu_mBRPGM1539	1	14.12		10		5	AT5G13280.1	R	5e-24
9	ACMP0165	1	15.404		10
10	At5g7	1	16.713		10		5	At5G11960	R	0
11	ACMP0162	1	18.019		10		5	AT5G11070.1	R	9e-48
12	cnu_mBRPGM0618	1	25.567		10		5	AT5G04850.2	R	3e-33
13	ACMP0400	1	26.579		10		5	AT5G04840.1	R	1e-23
14	ACMP0734	1	30.466		10		5	AT5G60550.1	X	4e-46
15	ACMP0474	1	32.108		7		1	AT1G74220.1	E	2e-26
16	cnu_mBRPGM1595	1	34.442		7		1	AT1G75400.1	E	1e-155
17	RSS0893	1	39.986		7		1	AT1G76900.2	E	1e-98
18	At1g61	1	50.416		7		1		E	0
19	cnu_mBRPGM1429	1	53.534		7		1	AT1G73020.2	E	2e-35
20	cnu_mBRPGM1334	1	63.87		7		3	AT3G62240.1	N	3e-71
21	ACMP0663	1	66.214		7
22	ACMP0558	1	72.608		7		3	AT3G55690.1	N	9e-32
23	ACMP0071	1	77.912		7		2	AT2G30990.2		2e-34
24	RSS1106	2	0		7
25	RSS3965	2	2.876		1		3	AT3G04570.1	F	9e-61
26	RSS0818	2	4.198		1
27	RSS2760	2	6.578		1		3	AT3G09690.2	F	5e-77
28	RSS0662	2	10.245		1		3	AT3G12780.1	F	1e-79
29	cnu_mBRPGM0117	2	17.781		1
30	cnu_mBRPGM0056	2	20.872		1
31	RSS2680	2	26.798		1		3	AT3G21215.1	F	2e-72
32	RSS3301	2	29.147		1		3	AT3G22380.2	F	1e-115
33	RSS3489	2	31.2		1		3	AT3G22750.1	F
34	ACMP0392	2	37.081		1
35	cnu_mBRPGM0690	2	43.591		3
36	cnu_mBRPGM1433	2	45.259		2
37	ACMP0849	2	48.22		2
38	cnu_mBRPGM0376	2	51.831		2
39	At2g3	2	56.198		2		2	At2g01640	K	0
40	cnu_mBRPGM1048	2	59.13		9		2	AT2G14490.	K	3e-27
41	cnu_mBRPGM0005	2	61.651		3
42	cnu_mBRPGM1371	2	65.639		7		2	AT2G20470.1	H	2e-47
43	cnu_mBRPGM1259	2	68.557		7		2	AT2G19090.1	H	1e-147
44	cnu_mBRPGM1376	2	72.764		7
45	cnu_mBRPGM0197	2	79.485		9
46	ACMP0628	2	80.889		9		1	AT1G15100.1	A	3e-36
47	cnu_mBRPGM1075	2	84.809		9		3	AT3G51840.1	M	4e-61
48	fito45	2	87.011		9
49	cnu_mBRPGM1278	2	89.393		9		3	AT3G47340.3	M	5e-82
50	ACMP0576	2	92.366		9		3	AT3G44050.1	M	3e-27
51	BRMS201	2	95.91		9		1	AT1G15780	A	2e-16
52	cnu_mBRPGM1178	2	101.993		6		3	AT3G48750.1	M	9e-57
53	ACMP0590	2	103.891		7		5	AT5G67200.1	X	3e-46
54	cnu_mBRPGM0979	2	110.764		7
55	cnu_mBRPGM1055	2	114.875		4		2	AT2G31220.1	J	4e-67
56	cnu_mBRPGM0008	2	118.957		5		2	AT2G34710.1	J	2e-47
57	cnu_mBRPGM0160	2	122.065		5		2	AT2G36970.1	J	1e-36
58	RSPL9	2	126.416		5		2	AT2G42200.1	J	0
59	ACMP0755	2	132.345		3		2	AT2G46260.1	J	7e-56
60	ACMP0605	2	133.878		5
61	At1g18	2	135.47				1
62	ACMP0311	2	139.843		5		2	AT2G42750.1	J	6e-21
63	cnu_mBRPGM0183	2	146.191		5		2	AT2G34580.2	J	7e-16
64	cnu_mBRPGM0145	2	155.453		4
65	cnu_mBRPGM0916	3	0		7
66	cnu_mBRPGM0432	3	1.509		5		3	AT3G13590.1	F	1e-58
67	RSS1242	3	7.241		5		3	AT3G08630.1	F	1e-62
68	RSS3562	3	9.312		3		3	AT3G18600.1	F	7e-59
69	Rss3694	3	10.278		5		3	AT3G06390.1	F	3e-65
70	RSS0361	3	11.956		5		3	AT3G05090.2	F	2e-57
71	cnu_mBRPGM1321	3	17.975		5		3	AT3G08630.1	F	1e-62
72	RSS0258	3	22.968		5		5	AT5G56590.1	F	1e-101
73	cnu_mBRPGM1571	3	28.745		8
74	BRMS287	3	29.599
75	cnu_m364a	3	32.364		5		3	AT3G21480 - AT3G21670	F
76	cnu_mBRPGM1256	3	34.535		5		3	AT3G19960.2	F	1e-172
77	cnu_mBRPGM1383	3	34.748		9		3	AT3G59970.3	N	3e-43
78	RSS0607	3	36.841		9		3	AT3G17810.1	F	5e-96
79	cnu_mBRPGM0016	3	38.4		10		5	AT5G07070.1 - AT5G08185	R	3e-59
80	RSS1146	3	39.421		7		3	AT3G24800.1	F	2e-75
81	RSS3878	3	40.669		5		3	AT3G18800.1	F	3e-83
82	RSS2831	3	48.583		9
83	ACMP0606	3	50.482		6		3	AT3G47640.1	M	3e-43
84	RSS0769	3	53.822		9		3	AT3G53460.2	N	2e-66
85	ACMP0239	3	55.693		9		3	AT3G54620.1	N	4e-36
86	ACMP0740	3	57.133		6		3	AT3G47640.1	M	3e-43
87	RSS0193	3	61.052		9		3	AT3G56850.1	N	8e-49
88	RSS2249	3	61.889		9		3	AT3G56850.1	N	1e-48
89	RSS1763	3	63.324		9		3	AT3G56910.1	N	2e-71
90	RSS2974	3	65.5		9		3	AT3G58970.1	N	2e-61
91	cnu_mBRPGM0085	3	67.996		3		3	AT3G47630.2	N	3e-28
92	RSS3250	3	70.173		9		3	AT3G62260.1	N	6e-62
93	cnu_mBRPGM0367	3	74.15		4		3	AT3G56760.1	N	9e-41
94	RPLT2	3	75.525
95	ACMP0359	3	78.013		6		1	AT1G53190.2	C	2e-45
96	At2g4	3	83.96		6		2	At2g01850	K
97	RSS2428	3	89.191		6		5	AT5G63980.1	X	6e-98
98	RSS1155	3	92.041		6		5	AT5G62050.1	X	4e-66
99	ACMP0257	3	92.579		6		5	AT5G62020.1	X	7e-43
100	ACMP0863	3	98.32		6
101	ACMP0691	3	100.497		3
102	cnu_mBRPGM0913	3	101.083		5
103	At3g5	3	104.256		3		3	At3g04950	F	0
104	cnu_mBRPGM1041	3	106.443		3		3	AT3G08010.1	F	2e-69
105	cnu_m098a	3	109.028		3		3	AT3G01085 - AT3G01540	F
106	cnu_mBRPGM0149	3	117.643		6		1	AT1G78700.1	E	1e-42
107	ACMP0213	3	131.5		5		3	AT3G17510.2	F	3e-59
108	ACMP0807	3	133.925		3
109	RSS0292	3	137.302		5		3	AT3G01120.1	F	1e-60
110	cnu_mBRPGM1430	3	137.466		6		5	AT5G62230.2	X	4e-24
111	At3g38	4	0		4		3	At3g54650	N
112	cnu_mBRPGM0882	4	4.63		4
113	cnu_mBRPGM0356	4	8.568		4		3
114	At3g36	4	31.449		4		3	At3g52300	N	0
115	ACMP0503	4	33.197
116	RSS2415	4	43.752		4		3	AT3G56200.1	N	5e-55
117	ACMP0069	4	49.244		4		3	AT3G15030.2	F	4e-36
118	BRMS111	4	59.367		4
119	RSS1165	4	63.354
120	ACMP0088	4	68.416		4
121	At5g23	4	69.608		4		5	At5g36880	S	0
122	ACMP0719	4	72.778		6		5	AT5G41950.1	S	3e-31
123	cnu_mBRPGM0128	4	81.365		6		5	AT5G36890	S	3e-25
124	cnu_mBRPGM0075	4	82.851		6		5	AT5G48380.1	S	0
125	ACMP0277	4	96.086		6
126	At2g7	4	97.763		6		2	At2g03870		0
127	RSS0033	4	99.867		6		3	AT3G26090.1	L	4e-85
128	ACMP0570	4	102.536		6		3	AT3G27310.1	L	4e-28
129	cnu_mBRPGM1190	4	104.042		6		5	AT5G48150.2 - AT5G53340	V/W
130	ACMP0185	4	109.268		10
131	ACMP0267	4	109.93		6		5	AT5G25757.1	Q	5e-68
132	cnu_mBRPGM1305	4	114.558		3		4	AT4G17616.1	U	1e-128
133	ACMP0427	4	117.991		3		4	AT4G15475.1	T	1e-33
134	KBrS003O10-05	4	118.809		3		4	AT4G16480.1	U	1e-118
135	KBrS003O10-08	4	119.687		3		4	AT4G16480.1	U	1e-118
136	ACMP0175	4	123.485		2		1	AT1G76600.1	E	6e-42
137	cnu_mBRPGM0714	4	128.421		3
138	RSS2439	4	130.283		3		4	AT4G24770.1	U	1e-56
139	cnu_mBRPGM0966	4	135.287		3		4	AT4G31780	U	7e-75
140	ACMP0603	4	140.172		3
141	cnu_mBRPGM1208	4	143.76		3		4	AT4G39920.1	U	1e-49
142	At4g31	4	161.556		6		4	At4g19490	U
143	ACMP0809	4	169.227		9		2	AT2G17290.1	H	9e-49
144	At4g58	5	0		1		4	At4g39690		0
145	RSS1032	5	10.551				4	AT4G27600.1	U	5e-82
146	cnu_mBRPGM0043	5	20.383		1		4	AT4G32500.1	U	1e-118
147	fito282	5	27.54
148	cnu_mBRPGM1448	5	38.927		1		4	AT4G30993.1	U	2e-22
149	cnu_mBRPGM0383	5	42.774		1
150	cnu_mBRPGM1228	5	43.972		1
151	RSS3702	5	45.605		1		4	AT4G28500.1		6e-83
152	cnu_mBRPGM1579	5	48.279		1		4	AT4G27630.3	U	5e-57
153	nia_m032a	5	52.004		1		4	AT4G24140 - AT4G24390	U	0
154	RSS2678	5	54.187		1		4
155	RSS0715	5	56.517		1		4
156	Na12-A07	5	58.598
157	cnu_mBRPGM1542	5	61.677		1		3	AT3G17790.1	F	1e-49
158	ACMP0174	5	64.164		1		4	AT4G20380.7	U	4e-43
159	ACMP0845	5	68.081		1
160	RTRM2	5	72.421				5	AT5G15580.1	R	0
161	cnu_mBRPGM0202	5	98.306		2		3	AT3G44110.2	M	2e-24
162	RSS2308	5	102.974		2
163	fito426	5	106.093
164	cnu_mBRPGM0325	5	108.547		1		3	AT3G48540.1	M	3e-28
165	ACMP0774	5	109.903		1		3	AT3G47990.1	M	1e-62
166	RSS2455	5	114.294		1		4	AT4G29060.2	U	2e-67
167	RSS0968	5	117.021		2		4	AT4G10430.3		2e-52
168	ACMP0240	5	120.584		2		1	AT1G68410.2	E	2e-53
169	ACMP0767	5	122.566		2		1	AT1G68760.1	E	5e-33
170	cnu_mBRPGM0702	5	125.953		2		1	AT1G71800.1	E	9e-37
171	RSS0477	5	131.444		2		1	AT1G74950.1	E	2e-60
172	ACMP0186	5	135.215		3
173	cnu_mBRPGM1361	5	141.656		2		1	AT1G77360.1	E	0
174	cnu_mBRPGM0961	6	0		1		4	AT4G03560.1	O	8e-35
175	At4g15	6	2.91		1		4	At4g12590	T	0
176	At5g16	6	5.929		1		5	At5g23610	Q	0
177	cnu_mBRPGM1085	6	10.117		1		4	AT4G03030.1	O
178	RSS0706	6	12.641		10		5	AT5G53280.1	W	1e-68
179	RIAA33	6	36.15		10		5	AT5G57420.1	W	0
180	cnu_mBRPGM0506	6	38.939		10
181	ACMP0526	6	42.089		10
182	RSS2112	6	43.714		10		5	AT5G55210.1	W	5e-52
183	ACMP0141	6	45.306		10
184	cnu_mBRPGM0146	6	48.843		10		5	AT5G54570.1	W	4e-67
185	cnu_mBRPGM0035	6	53.62		9
186	RSS1063	6	58.388		9		2	AT2G14910.2		1e-81
187	cnu_mBRPGM0503	6	67.268		9		5	AT5G41670.2	S	2e-63
188	cnu_m179a	6	68.082		7
189	RSS0140	6	74.857
190	cnu_mBRPGM0945	6	81.657		9
191	cnu_mBRPGM0995	6	81.91		7
192	ACMP0357	6	87.584		9
193	RSS3287	6	89.053		9
194	cnu_mBRPGM0701	6	119.405		9		5	AT5G66030.2	W	1e-48
195	cnu_mBRPGM0473	6	125.246		3
196	cnu_mBRPGM1303	7	0		9		4	AT4G30990.2	U	2e-67
197	cnu_mBRPGM0337	7	19.934		5		1	AT1G04710.1	A	9e-38
198	RSS1585	7	27.188		8		1	AT1G26110.1	B	1e-147
199	nia_m050a	7	31.294		8		1	AT1G12990 - AT1G13900	A
200	cnu_mBRPGM1065	7	35.35		8
201	RSS3273	7	38.118		8		1	AT1G12850.1	A	3e-64
202	RSS2610	7	44.82		8		1	AT1G27460.1	B	2e-20
203	At1g23	7	46.911		8		1	At1g24310	B	0
204	RSS3644	7	50.783 ;		8		4	AT4G02080.1	U	3e-94
205	cnu_mBRPGM0641	7	54.241		8		4	AT4G40060.1	U	6e-88
206	BRMS246	7	56.507
207	At4g45	7	64.723		8		4	At4g31460	U	0
208	ACMP0579	7	73.642		8		4	AT4G31410.2	U	4e-55
209	RAIR1	7	77.391		8		4	AT4G12550.1	U	0
210	cnu_m090a	7	81.623		8		1	AT1G30800 - AT1G30970	B
211	cnu_mBRPGM0694	7	91.803		8
212	At4g22	7	105.914		8		4	At4g15802	T	0
213	At2g60	8	0		3		2	At2g45690	J
214	RSS0198	8	15.367		3		4	AT4G03420.1	O	4e-68
215	cnu_mBRPGM0352	8	16.565		3
216	cnu_mBRPGM0970	8	20.264		Scaffold000352			ATCG01310.1		0
217	cnu_mBRPGM1038	8	26.47		3		4	AT4G07410.2		5e-84
218	At2g34	8	28.419				2	At2g23390	I
219	At2g41	8	30.416				2	At2g26990	I	0
220	ACMP0264	8	32.619				2	AT2G28390.1	I	1e-34
221	ACMP0856	8	36.091
222	RSS0860	8	40.971		3		2
223	RSS1041	8	49.638		3		2
224	RSS2207	8	54.307		3		2	AT2G34820.1	J	5e-71
225	RSS2841	8	57.168
226	RSS2981	8	59.027		3		2	AT2G31880.1	J	1e-76
227	At2g47	8	61.202		3		2	At2g31490	J
228	cnu_mBRPGM0187	8	69.736		3		5	AT5G58930.1	W	5e-26
229	RGRF7	8	72.469				5	AT5G22985.1	R	0
230	RSS1261	8	74.482				5
231	RSS0692	8	75.377		3		5	AT5G22000.3	R	5e-83
232	ACMP0475	8	80.8		3		5	AT5G11070.1	R	6e-40
233	RSS2764	8	81.829		3		5	AT5G11670.1	R	2e-82
234	RSS0486	8	83.616		3		5	AT5G11520.1	R	1e-57
235	RSS1117	8	88.502		3		5	AT5G22000.3	R	4e-87
236	RGA20OX3	8	101.489		3		5	AT5G07200.1	R	0
237	cnu_mBRPGM0566	8	109.361		3		5	AT5G18180.1	R	3e-15
238	RSS3168	8	117.262		3
239	RSS3090	9	0		6		1	AT1G11430.1	A	1e-110
240	cnu_mBRPGM1034	9	8.023		9		1	AT1G08250.1	A	1e-129
241	ACMP0222	9	10.168		6
242	cnu_mBRPGM0545	9	12.82		6		1	AT1G15960.1	A	1e-68
243	cnu_mBRPGM0896	9	35.609		6
244	cnu_mBRPGM1105	9	40.776		1		1	AT1G12410.1	A	5e-32
245	cnu_mBRPGM1192	9	43.705		2		1	AT1G64790.2	A	2e-40
246	RARF19	9	46.48		6		1	AT1G19220.1	A
247	cnu_mBRPGM1280	9	49.147		6		1	AT1G20480.1	B	2e-83
248	RSS2736	9	51.489		6		1	AT1G21390.1	B	4e-65
249	RSS1945	9	53.85		9		1	AT1G22850.1	B	1e-134
250	ACMP0813	9	56.68		6		1	AT1G12380.1	A	3e-48
251	cnu_mBRPGM0579	9	61.328		10		1	AT1G03590.1	A	0
252	cnu_mBRPGM1328	9	64.396		10		1	AT1G02780.1	A	1e-119
253	ACMP0102	9	66.179		8
254	ACMP0079	9	69.288		8		4	AT4G18970.1	U	8e-24
255	ACMP0212	9	69.94		8
256	cnu_mBRPGM0219	9	74.581		6		1	AT1G48090.1	C	9e-21
257	RSS3638	9	84.029		8
258	cnu_mBRPGM0247	9	105.276		6
