# Supplementary material for: Quantitative Trait Loci for Morphological Traits and their Association with Functional Genes in Raphanus sativus
Source: Front Plant Sci. 2016 Mar 4;7:255. doi: 10.3389/fpls.2016.00255 (PMC4777717; doi:10.3389/fpls.2016.00255)
Supplement: Supplementary Table 3 — Gene-based markers sequence information and their respective homologs gene information in Arabidopsis. [file Table3.XLSX]

## Sheet: Sheet1
	sTable 3 Gene-base markers sequence information and their respective homologues gene information in Arabidopsis
				Gene information in Arabidopsis
Gene Type	Marker name	Forward primer(5'-3')	Reverse primer(3'-5')	Block	Locus	Gene name	TAIR Accession Number	Putative function
AUX/IAA
	RARR4	GATGACAGTCTCGTTGATCGTAT	TCTTGAGAAGCTCATAACCAGTC	A	AT1G10470.1	ARR4	Gene:2194583	Encodes a two-component response regulator. Acts redundantly with ARR3 in the control of circadian period in a cytokinin-independent manner.
	RIAA34	AGTAATGAAGGATACAGACGGAAG	TCTCTGTAGACCAAACAGAACTCA	A	AT1G15050.1	IAA34	Gene:2196183	Belongs to auxin inducible gene family.
	RARR7	GTGACGACTGTAGAGAGTGGAAC	CACTGTCTTCTTGAAGCTTTCTC	A	AT1G19050.1	ARR7	Gene:2011285	Encodes a member of the Arabidopsis response regulator (ARR) family, most closely related to ARR15. A two-component response regulator protein containing a phosphate accepting domain in the receiver domain
	RARF19	CTTCTTGTTCAACCTCACCTTC	ATGATGGTAGTGGGAAAGTTTG	A	AT1G19220.1	ARF19	Gene:2202204	Encodes an auxin response factor that contains the conserved VP1-B3 DNA-binding domain at its N-terminus and the Aux/IAA-like domains III and IV present in most ARFs at its C-terminus.
	RARR15	AGATCTCTGCTTGTAAAGTGACG	CTGAGTGCTGAAGACTCTTTGAT	B	AT1G74890.1	ARR15	Gene:3434806	Encodes a nuclear response regulator that acts as a negative regulator in cytokinin-mediated signal transduction. Transcript accumulates in leaves and roots in response to cytokinin treatment.
	RIAA13	GGCTAAGGATTTTCCTTCTGTT	CTCCATCCATGTTCACCTTAAT	J	AT2G33310.3	IAA13	Gene:4515101213	Auxin induced gene,DNA-dependent, RNA splicing, RNA splicing, via endonucleolytic cleavage and ligation, methionine biosynthetic process, nucleus, protein binding, regulation of transcription, regulation of transcription, DNA-dependent, response to auxin stimulus, response to cyclopentenone, sequence-specific DNA binding transcription factor activity, via endonucleolytic cleavage and ligation
	RAIR9	ATTCTGTTGTGGGAGAGCTAAA	CCTGGTGATATTGGATCAGTCT	J	AT2G34680.1	AIR9	Gene:2061538	isolated from differential screening of a cDNA library from auxin-treated root culture. sequence does not show homology to any known proteins and is predicted to be extracellular.
	RAUX1	CAAGTGGCTCAAGTGTTATTGA	GTCCATGTTCTCTTGTCCAGAT	J	AT2G38120.1	AUX1	Gene:2042951	Encodes an auxin influx transporter. AUX1 resides at the apical plasma membrane of protophloem cells and at highly dynamic subpopulations of Golgi apparatus and endosomes in all cell types. AUX1 action in the lateral root cap and/or epidermal cells influences lateral root initiation and positioning.
	RARR8	ACCCAAATGCACTCTCTACATC	CAGCTAACTTCACTGGTTTCAAG	J	AT2G41310.1	ARR8	Gene:2040281	Encodes an A- type response Regulator that is primarily expressed in the root and is involved in cytokinin-mediated signalling.
	RARF11	CGAGGAGGCATTTACTTACAAC	TTCTCCTTCGAATCTCATCCTA	J	AT2G46530.3	ARF11	Gene:1009021424	auxin response factor 11 (ARF11); FUNCTIONS IN: sequence-specific DNA binding transcription factor activity; INVOLVED IN: response to hormone stimulus, regulation of transcription, DNA-dependent, regulation of transcription;
	RIAA20	CCTCAGGGACTCAATATTTCAA	AGTCACCTTCCTTATCTGCGTA	J	AT2G46990.1	IAA20	Gene:2041323	Encodes a member of the Aux/IAA family of proteins implicated in auxin signaling. IAA20 lacks the conserved degron (domain II) found in many family members, and IAA20 fusion proteins are stable in Arabidopsis seedlings.
	RIAA30	GGAACCTAAGCACGGACCTG	TTCTCACGCTAGACAAGAACA	N	AT3G62100.1	IAA30	Gene:2098022	Encodes a member of the Aux/IAA family of proteins implicated in auxin signaling. IAA30 lacks the conserved degron (domain II) found in many family members. IAA30 transcripts are induced by auxin treatment and accumulate preferentially in the quiescent center cells of the root meristem
	RAIR1	TCTCTCAACCTCCTCTTCTTCA	ACATTGAGGAGTACGCTGAGAT		AT4G12550.1	AIR1	Gene:2135599	isolated from differential screening of a cDNA library from auxin-treated root culture. encodes a protein that is related to a large family of proteins that consist of a proline-rich or glycine-rich N-terminus and a hydrophobic, possibly membrane spanning C-terminus.
	RARR2	GATGCTGATAACAACTCGTCTTC	CGGGTACATTCATCATCTCTAAG	T	AT4G16110.1	ARR2	Gene:2130094	Acts in concert with other type-B ARRs in the cytokinin signaling pathway. AHK3 mediates cytokinin-induced phosphorylation of ARR2 on the Asp-80 residue.
	RARR10	GTATGTGATGAAAGGAGTCAAGC	CACAGTTTCCTGAACCATTACTC	U	AT4G31920.1	ARR10	Gene:3438549	Encodes an Arabidopsis response regulator (ARR) protein that acts in concert with other type-B ARRs in the cytokinin signaling pathway. Also involved in cytokinin-dependent inhibition of hypocotyl elongation and cytokinin-dependent greening and shooting in tissue culture.
	RIAA29	CTGGAATCCGAGTCTTCAATAG	GCTTGATATCCACTTTTCTTGC	U	AT4G32280.1	IAA29	Gene:2116504	INDOLE-3-ACETIC ACID INDUCIBLE 29 Auxin inducible protein.
	RAUR3	TTCTTATTCGTGAAGTCGGAGT	GATATCACGAGCAAGTTCCTTC	U	AT4G37390.1	AUR3	Gene:2126361	Encodes an IAA-amido synthase that conjugates Asp and other amino acids to auxin in vitro. Lines carrying insertions in this gene are hypersensitive to auxin. May function as a negative component in auxin signaling by regulating auxin activity
	RARF7	GATATGCGGCTAAAACAAGAAC	CACTCCTCCATAGTTTGAAAGC	R	AT5G20730.3	ARF7	Gene:1005716013	Encodes an auxin-regulated transcriptional activator. Activates expression of IAA1 and IAA9 in the presence of auxin. Mutants affect blue light and gravitropic and auxin mediated growth responses.
	RIAA33	TTGTGCTAGAGGGACGTTCTAT	TCCTCCTCACTCGTTTCTTTTA	W	AT5G57420.1	IAA33	Gene:3441974	Belongs to auxin inducible gene family.
	RARF4	TGTACAAAGGTTCACAAGCAAG	TCACAGAAGATGACTTTGATGC		AT5G60450.1	ARF4	Gene:2175097	Encodes a member of the ARF family of transcription factors which mediate auxin responses. ARF4 appears to have redundant function with ETT(ARF3) in specifying abaxial cell identity.
Cytokinin
	RCKX1-1	TCTACGCGAGACTCTAAAATACG	CTCCTTTCCCTGTAACAATCTCT	J	AT2G41510.1	ATCKX1	Gene:2062713	It encodes a protein whose sequence is similar to cytokinin oxidase/dehydrogenase, which catalyzes the degradation of cytokinins
	RCKX1-2	AGAAGAAGCTAGCTCTATGGATCA	GTACTCTAGATCGTTTTTCCCTGA
	RCKX1-3	AACAAATCTCACAGTAGCAGCAAG	CTGATTCCAGCGTTAGACAGAGTA
	RCKX5-1	TTAGCTGTACTTCATCCATCCTCA	CAAGTAATCAGTCCATGACTTTGG	E	AT1G75450.1	CKX5		cytokinin catabolic process, cytokinin metabolic process, jasmonic acid metabolic process, oxidation-reduction process, response to jasmonic acid stimulus
	RCKX5-2	AAGTGGCCCTATTCTTATCTACCC	GATACTGCTTCACATTGATCTTGG
	RCKX7-1	TACTACGAGTCAAACGGTCAGAAG	GATCTCTTGGTTTTGAGCTACCAT	R	AT5G21482.1	CKX7		cytokinin catabolic process, cytokinin metabolic process, oxidation-reduction process
	RCKX7-2	GAGAATCATTTCGAGGTTGGAT	CCACCTAAAACAGAGAAGAAGAGC
	RCKX4	GGTCTCGCATACTCTACAGTGAC	CTTGGCTACTTCGAGAACATAGA	U	AT4G29740.2	CKX4	Gene:1005713969	It encodes a protein whose sequence is similar to cytokinin oxidase/dehydrogenase, which catalyzes the degradation of cytokinins
	RCKX3	TCAAGGTGTCTAGGACCTGTTTA	ACATTAGTGATCTGTGGACCGTA	W	AT5G56970.1	CKX3	Gene:2164614	It encodes a protein whose sequence is similar to cytokinin oxidase/dehydrogenase, which catalyzes the degradation of cytokinins
	RCKX6	GGTATATTGTGATGACAGGTGAGA	GGTATATTGTGATGACAGGTGAGA	E	AT1G75450.2	CKX6	Gene:6530296575	It encodes a protein whose sequence is similar to cytokinin oxidase/dehydrogenase, which catalyzes the degradation of cytokinins.
PLETHORA
	RPLT2	ACCTTACCCTCTAAGCATTCAAC	CATTGTAGAGCTGTGAAGTGTGA	C	AT1G51190.1	PLT2	Gene:2008215	Encodes a member of the AINTEGUMENTA-like (AIL) subclass of the AP2/EREBP family of transcription factors and is essential for quiescent center (QC) specification and stem cell activity. It is a key effector for establishment of the stem cell niche during embryonic pattern formation. It is transcribed in response to auxin accumulation and is dependent on auxin response transcription factors.
	RPLT1	CAAAGACCTCTACTTGGGAACTT	GTTGAATGCTTAGAGGGTAAGGT	F	AT3G20840.1	PLT1	Gene:2091890	Encodes a member of the AINTEGUMENTA-like (AIL) subclass of the AP2/EREBP family of transcription factors and is essential for quiescent center (QC) specification and stem cell activity. It is a key effector for establishment of the stem cell niche during embryonic pattern formation. It is transcribed in response to auxin accumulation and is dependent on auxin response transcription factors.
Gibberellin
	RGA2OX3	GGTTACGGTACTAAAAGGATTGG	AGTGATCAGGTGTAACATCAACC	J	AT2G34555.1	GA2OX3	Gene:3697043	Encodes a gibberellin 2-oxidase that acts on C19 gibberellins to deactivate them.
	RGA20OX2	GAGAGTTGTGGCTATGCAAGTAG	CGAACTCTTGTCCTAATGTATCG	W	AT5G51810.1	GA20OX2	Gene:2165340	Encodes gibberellin 20-oxidase. Involved in gibberellin biosynthesis. Up-regulated by far red light in elongating petioles. Not regulated by a circadian clock.
	RGA20OX3	ATGGCTCTAACGAATGGAAGATAC	GAACTCGTCAAGAGTGTTCATGTC	R	AT5G07200.1	GA20OX3		ARABIDOPSIS THALIANA GIBBERELLIN 20-OXIDASE 3, ATGA20OX3, GA20OX3, GIBBERELLIN 20-OXIDASE 3, YAP169
	RGA20OX3-1	AGGCTACTAGACTCGTCTCAAAGG	GAGAATCTCCCGACGAAACTACTA
	RATGA2OX4	GGTATGGTTTTAGAGACATTGGAC	GTATCCAAGCTATACATGCAGTTG	C	AT1G47990.1	ATGA2OX4	Gene:2202586	Encodes a gibberellin 2-oxidase that acts on C19 gibberellins. AtGA2OX4 expression is responsive to cytokinin and KNOX activities
Growth Factor
	RCRF7	GTAAGAAGCTAGTCAAGGAAATCG	CGTTCAGGTCTTCCTTTAACTCT	B	AT1G22985.1	CRF7	Gene:3688088	encodes a member of the ERF (ethylene response factor) subfamily B-5 of ERF/AP2 transcription factor family. The protein contains one AP2 domain. There are 7 members in this subfamily.
	RCRF8	GCCTCGTTAAAGAGATCGTAATC	TCCTCAGCAGTGTTAAAAGTACC	E	AT1G71130.1	CRF8	Gene:2026300	encodes a member of the ERF (ethylene response factor) subfamily B-5 of ERF/AP2 transcription factor family. The protein contains one AP2 domain. There are 7 members in this subfamily.
	RGRF3	CTTCTCTCTCTCTTTCTTCAATGG	CAACATGTACCTGTAGATCAGAGC	J	AT2G36400.1	AtGRF3	Gene:2044872	Growth regulating factor encoding transcription activator. One of the nine members of a GRF gene family, containing nuclear targeting domain. Mutants result in smaller leaves indicating the role of the gene in leaf development. Expressed in root, shoot and flower
	RLRD3	CTACGGTGTTGCTCGTGTCA	AGGAAGGCTCATAAGGTGGA	J	AT2G39830.1	LRD3	Gene:2063931	Essential for early phloem development and function, and for root system development.
	RSPL9	CTCTTCTGTCAAATCCACATCAAC	ATAAGCCCTTGTGTTCTCATCTTC	J	AT2G42200.1	AtSPL9	Gene:2059973	Encodes a putative transcriptional regulator that is involved in the vegetative to reproductive phase transition. Expression is regulated by MIR156b. SPL activity nonautonomously inhibits initiation of new leaves at the shoot apical meristem.
	RCRF5	GTACTAGACTCTGGCTTGGGACT	CAGAGACAGTTTCAAGGTCAATC	J	AT2G46310.1	CRF5	Gene:2062953	CRF5 encodes one of the six cytokinin response factors. It is transcriptionally upregulated in response to cytokinin. CRF5 belongs to the AP2/ERF superfamily of the transcriptional factors.
	RGRF5	ACTGGAACATCAAGCCCTAA	ATGAAGTGACAAAGCGGAAG	F	AT3G13960.1	GRF5	Gene:2088271	Growth regulating factor encoding transcription activator. One of the nine members of a GRF gene family, containing nuclear targeting domain. Involved in leaf development and expressed in root, shoot and flower.
	RGRF4	TGTTGGCTGGTGCTTCTGTT	GCTGTCGTTGTGATGGTGGT	N	AT3G52910.1	GRF4	Gene:2085220	Growth regulating factor encoding transcription activator. One of the nine members of a GRF gene family, containing nuclear targeting domain.
	RGRF8	GAATCTGCCGTTGTCTATGT	CTGGTCTACTATTGGCTCTTT	U	AT4G24150.1	GRF8	Gene:2134985	Growth regulating factor encoding transcription activator. One of the nine members of a GRF gene family, containing nuclear targeting domain. Involved in leaf development and expressed in shoot and flower.
	RGRF2	AGAACAGATGGGAAGAAATG	GGGTTGTAAGTTGACGGTGG	U	AT4G37740.1	GRF2	Gene:2137548	Growth regulating factor encoding transcription activator. One of the nine members of a GRF gene family, containing nuclear targeting domain. Mutants result in smaller leaves indicating the role of the gene in leaf development. Expressed in root, shoot and flower
	RARF7	GATATGCGGCTAAAACAAGAAC	CACTCCTCCATAGTTTGAAAGC	R	AT5G20730.3	ARF7	Gene:1005716013	Encodes an auxin-regulated transcriptional activator. Activates expression of IAA1 and IAA9 in the presence of auxin. Mutants affect blue light and gravitropic and auxin mediated growth responses.
	RCRF3	ATCACTGTTGAGCCTAGCTGTAA	AACTTCTTTATCTGACCGGAGAC	W	AT5G53290.1	CRF3	Gene:2154271	encodes a member of the ERF (ethylene response factor) subfamily B-5 of ERF/AP2 transcription factor family. The protein contains one AP2 domain. There are 7 members in this subfamily.
	RGRF7	TCGCATCTATTCCTGTTCCT	TTTCTTTCCGTCTGTTCTCC	W	AT5G53660.1	GRF7	Gene:2168675	Growth regulating factor encoding transcription activator. One of the nine members of a GRF gene family, containing nuclear targeting domain. Involved in leaf development and expressed in shoot and flower.
